# Supplementary material for: The Autism-Related Protein PX-RICS Mediates GABAergic Synaptic Plasticity in Hippocampal Neurons and Emotional Learning in Mice
Source: PubMed Central journal article supplement — eBioMedicine. 2018 Jul 22;34:189–200. doi: 10.1016/j.ebiom.2018.07.011 (PMC6116350; doi:10.1016/j.ebiom.2018.07.011), 2018-07-22
Supplement: mmc1.pdf [file mmc1.pdf]

Procedure 1

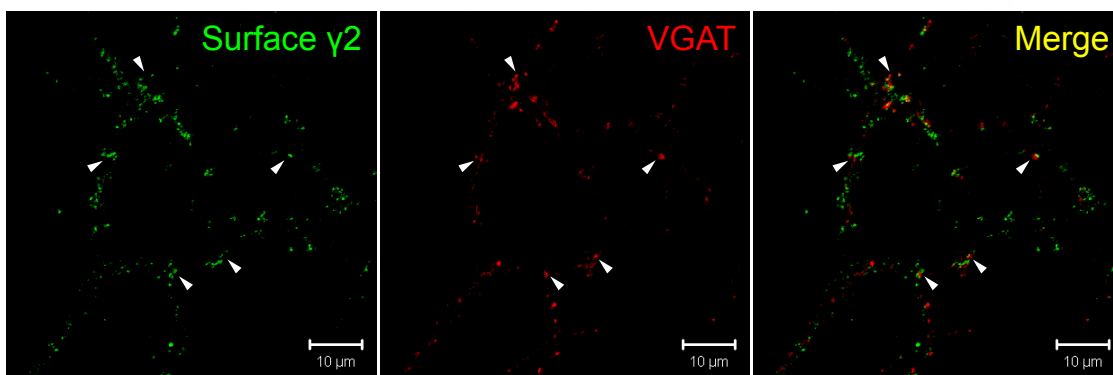

Procedure 2

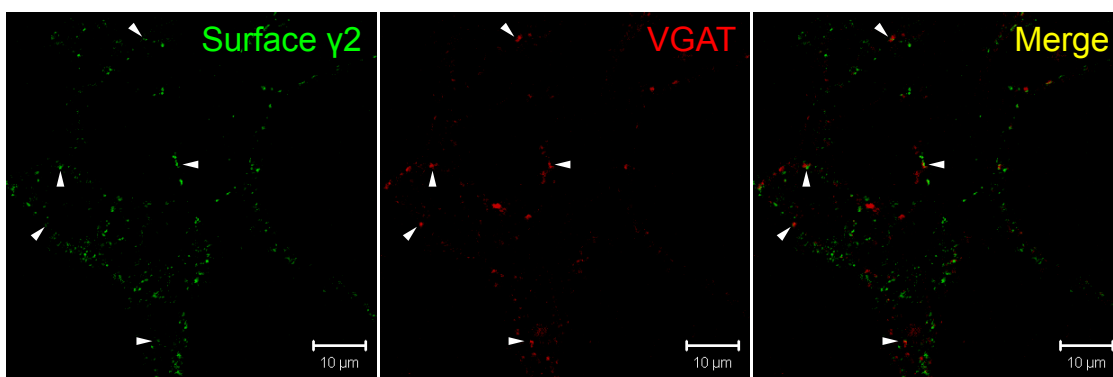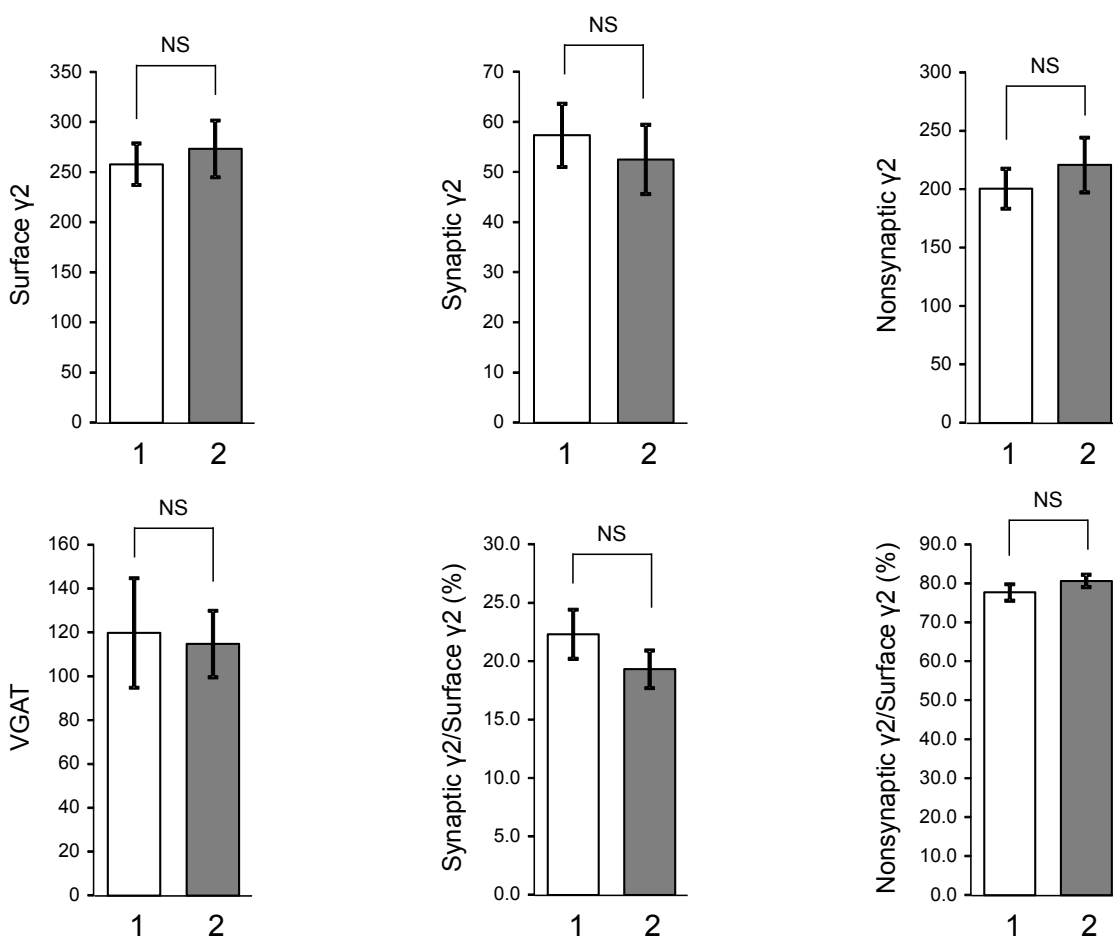

**Supplementary Fig. 1.** Quantitative comparison of surface GABA<sub>A</sub>R localization detected with two distinct labeling procedures

Procedure 1: WT mouse hippocampal neurons (14 DIV) were labeled with a rabbit anti- $\gamma$ 2 antibody and then with an Alexa Fluor 488-conjugated anti-rabbit IgG antibody.

After fixation and permeabilization, the neurons were stained with a mouse anti-VGAT antibody, followed by with an Alexa Fluor 594-conjugated anti-mouse IgG antibody.

Procedure 2 (a control procedure): WT mouse hippocampal neurons (14 DIV) were labeled with a rabbit anti- $\gamma$ 2 antibody and then fixed. After labeling with an Alexa Fluor 488-conjugated anti-rabbit IgG antibody and permeabilization, the neurons were stained with a mouse anti-VGAT antibody, followed by with an Alexa Fluor 594-conjugated anti-mouse IgG antibody. Puncta of surface GABA<sub>A</sub>Rs (green) that overlap with those of the presynaptic marker VGAT (red) were regarded as synaptically localized GABA<sub>A</sub>Rs (arrowheads). The number of puncta was quantified using ImageJ. Data are shown as the mean  $\pm$  SEM. NS, not significant (Student's *t*-test). *n* = 5 (procedure 1) and 5 (procedure 2) across two independent experiments. There was no significant difference in the number of synaptic GABA<sub>A</sub>Rs and the ratio of synaptic to surface GABA<sub>A</sub>Rs between the procedures. We reasoned that artificial aggregation of surface GABA<sub>A</sub>Rs was kept to the minimum in our surface labeling procedure.

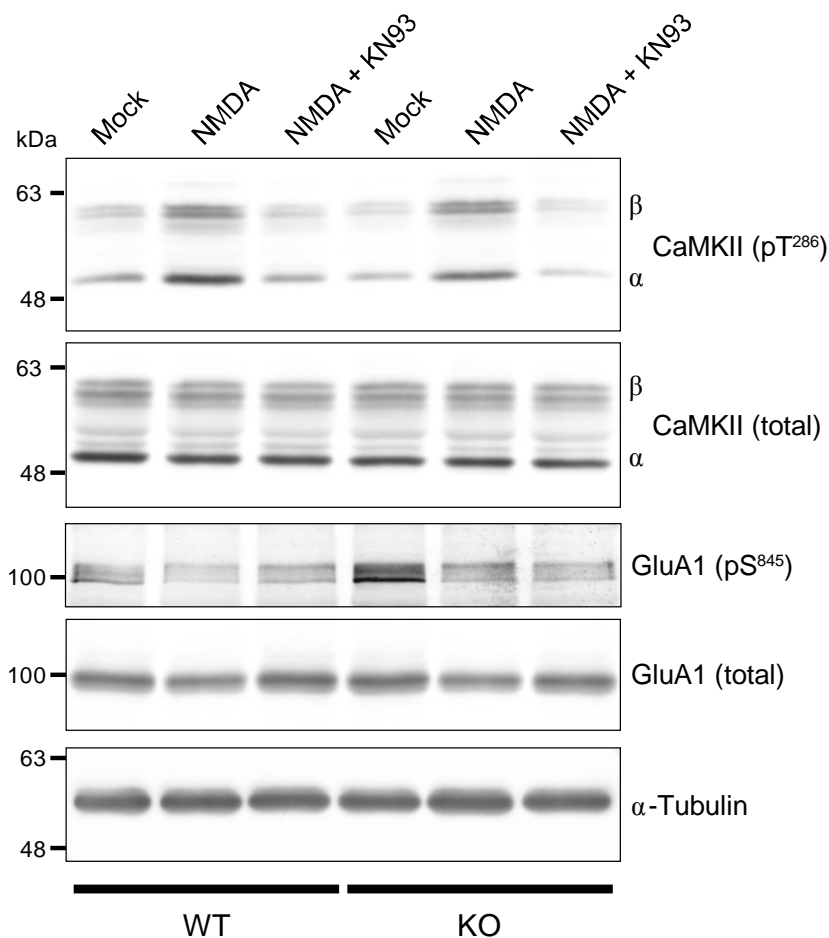

**Supplementary Fig. 2.** The stimulation conditions for chem-iLTP induction represent a valid experimental model. WT and KO hippocampal neurons (14 DIV) were briefly stimulated with 20  $\mu$ M NMDA (plus 10  $\mu$ M CNQX) for 3 min in the presence or absence of the cell-permeable CaMKII inhibitor KN93, and the cell lysates were analyzed by immunoblotting with the indicated antibodies.  $\alpha$ -tubulin was used as a loading control. We observed two major hallmarks of chem-iLTP<sup>27,46</sup>: an increase in CaMKII autophosphorylated at Thr<sup>286</sup> and a decrease in the GluA1 subunit of  $\alpha$ -amino-3-hydroxy-5-methyl-4-isoxazolepropionic acid receptors (AMPA receptors) phosphorylated at Ser<sup>845</sup>. Pretreatment of neurons with KN93 blocked Thr<sup>286</sup> phosphorylation of CaMKII, but not Ser<sup>845</sup> dephosphorylation of GluA1. These results validated our protocol for chem-iLTP, and we used identical conditions for the subsequent experiments.

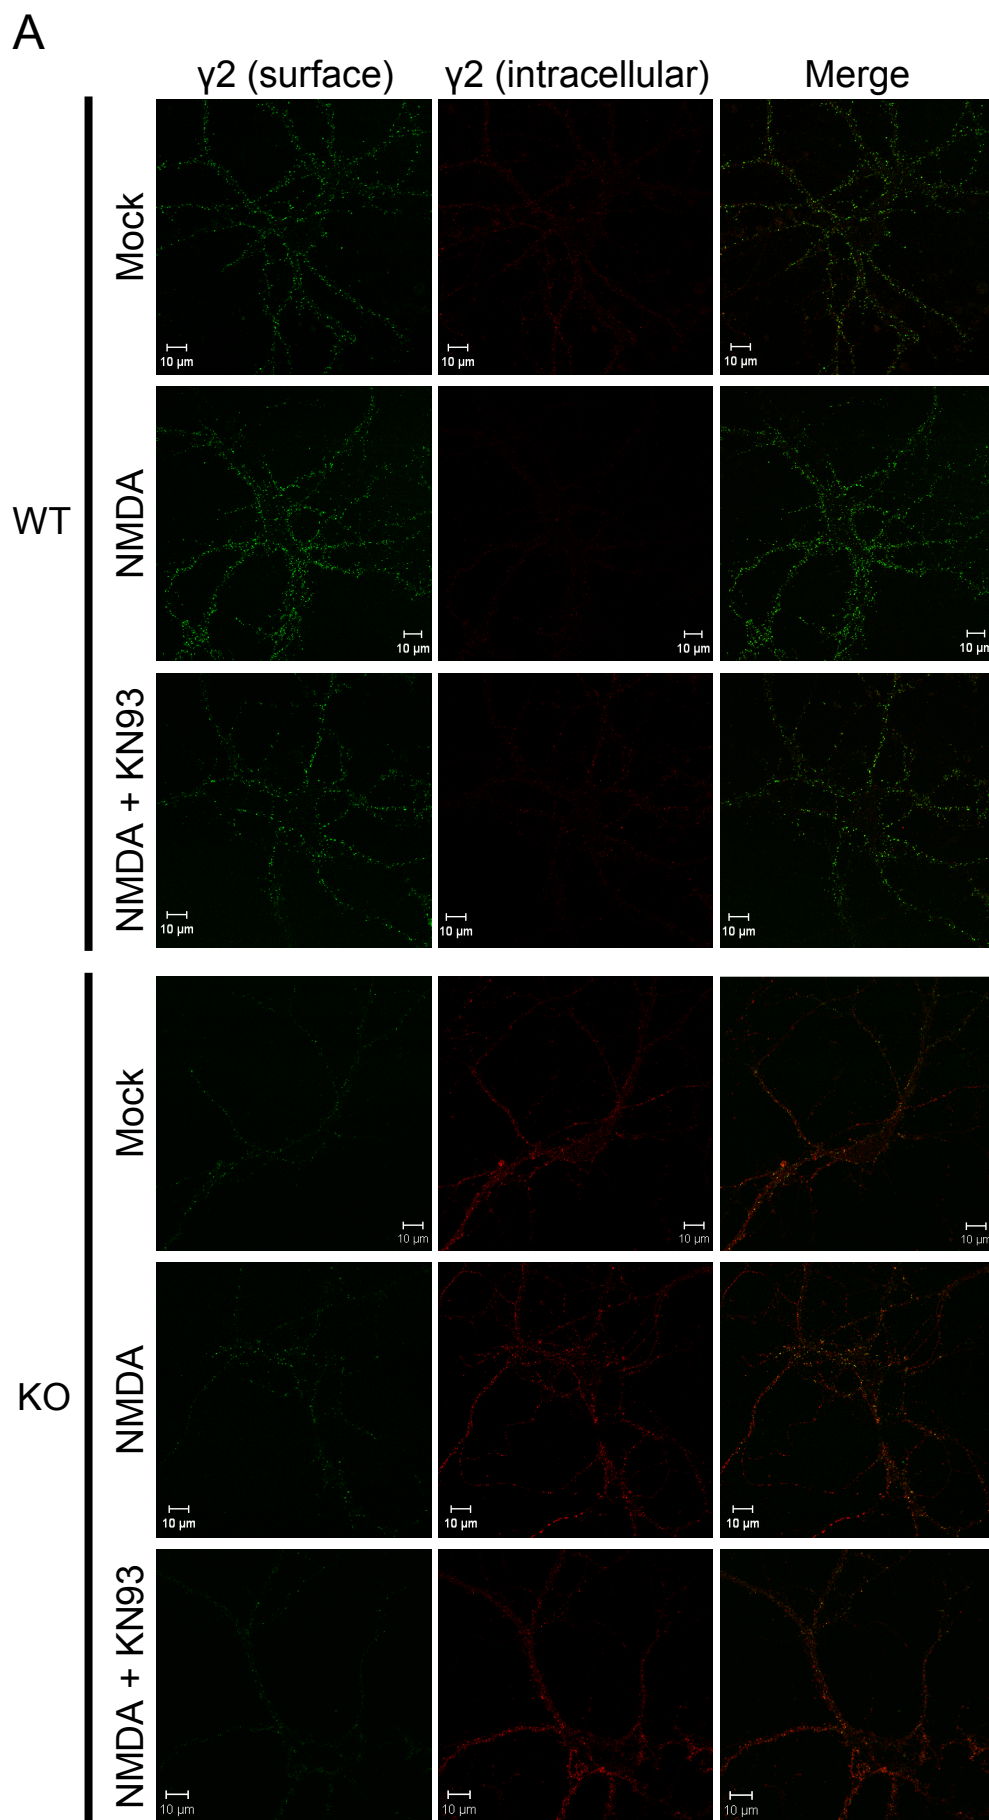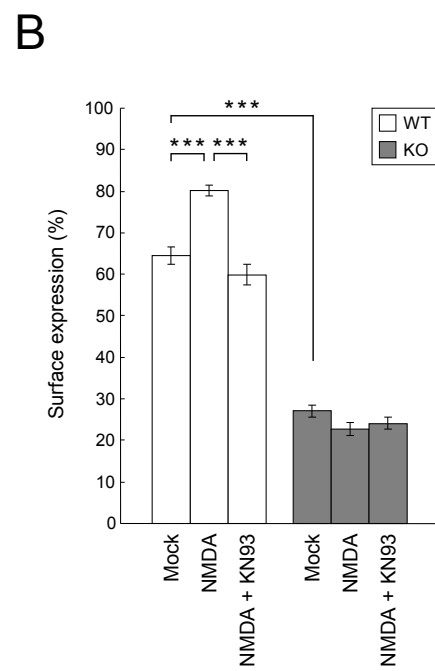



**Supplementary Fig. 3.** PX-RICS is required for GABA<sub>A</sub>R transport during chem-iLTP  
(A) WT and KO hippocampal neurons were treated with vehicle (mock) or moderately stimulated with NMDA in the presence or absence of KN93 as indicated, and surface (green) and intracellular (red)  $\gamma 2$  subunits were separately visualized. Scale bars, 10  $\mu\text{m}$ .  
(B) Quantitative analyses of the  $\gamma 2$  fluorescent signals in the perisomatic regions. Data are shown as the mean  $\pm$  SEM. \*\*\* $P < 0.001$  (Student's  $t$ -test).  $n = 10$  (WT) and 10 (KO) across two independent experiments.

A

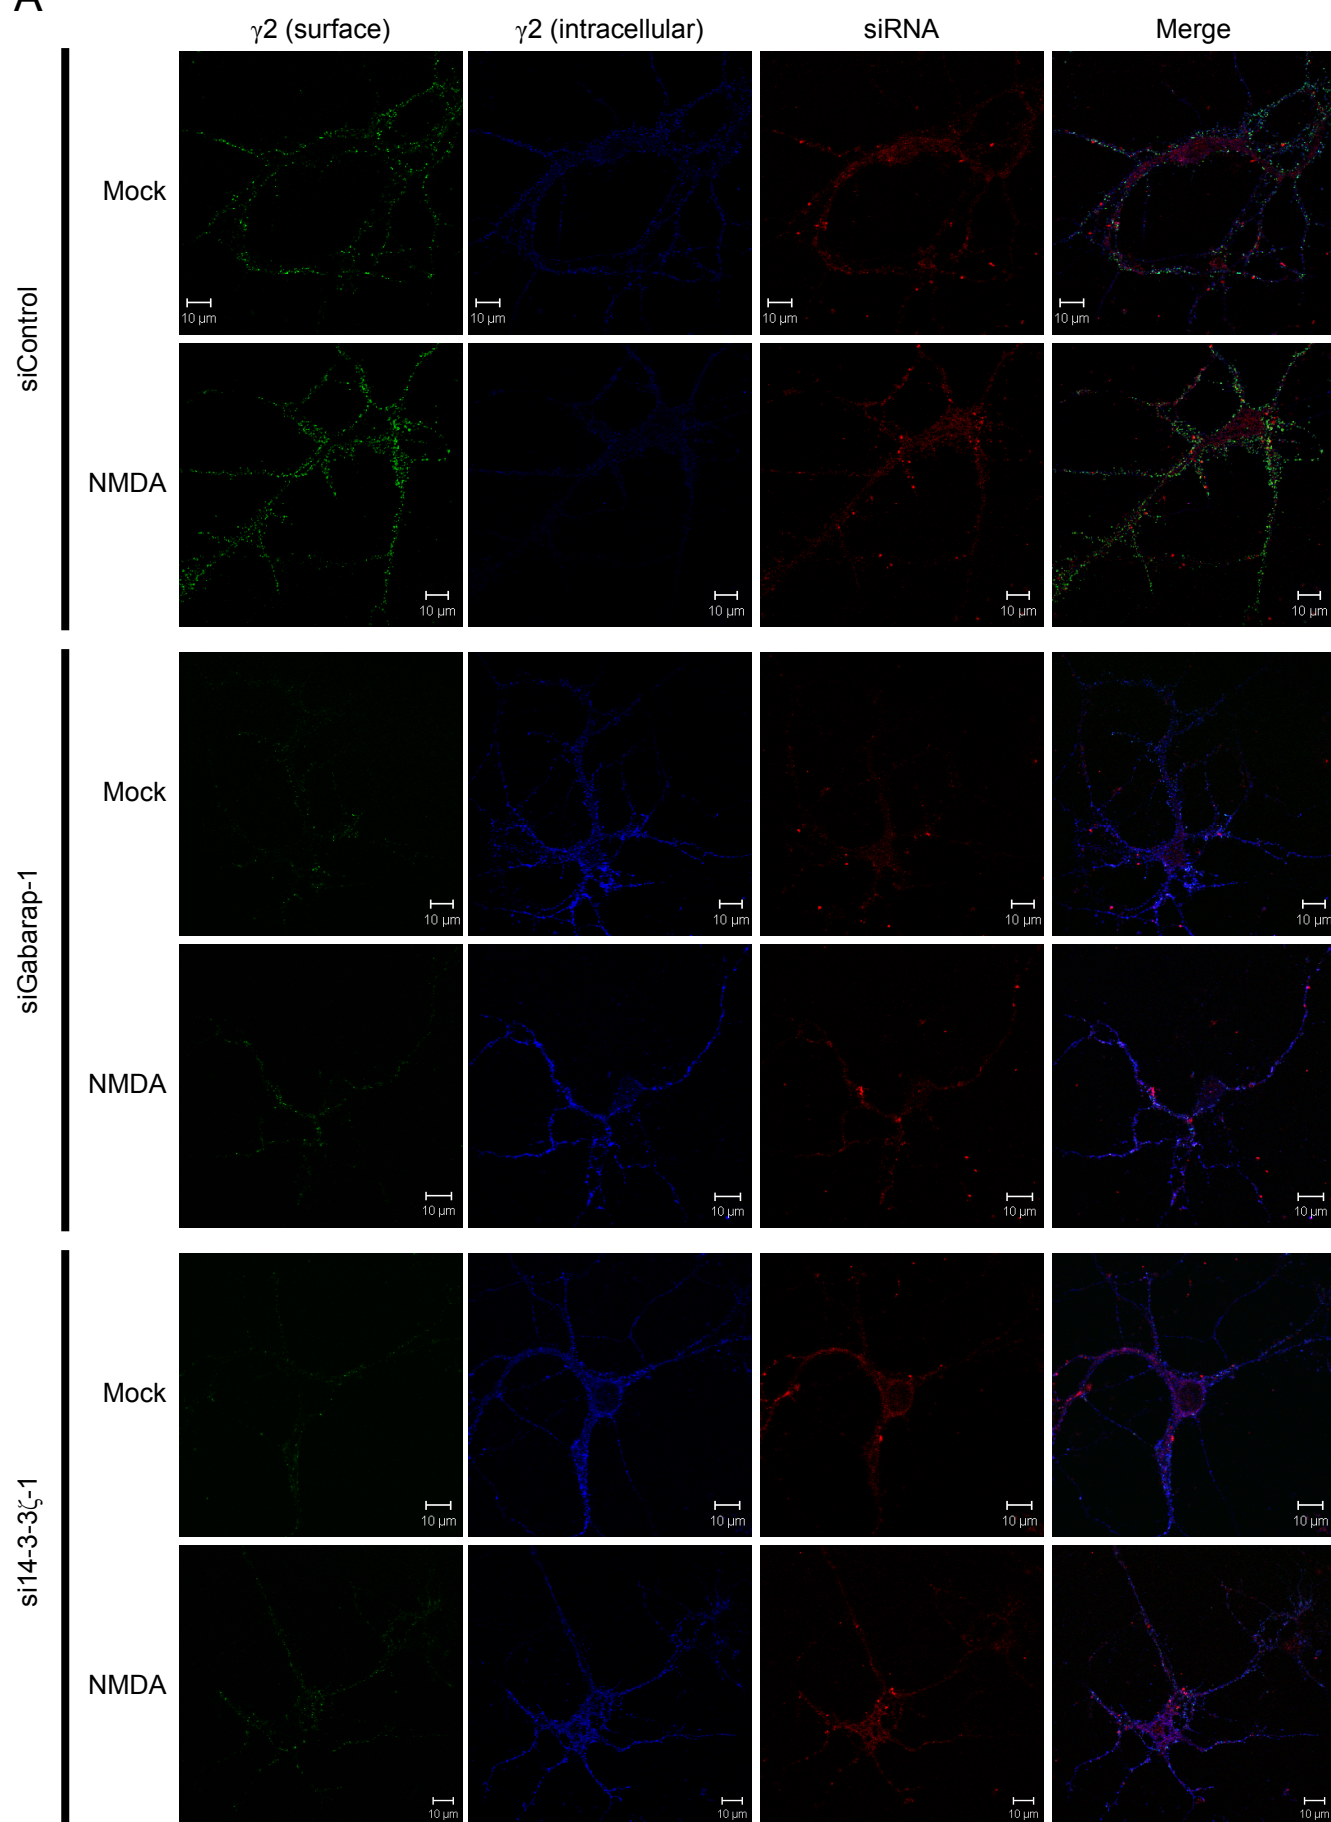

A (continued)

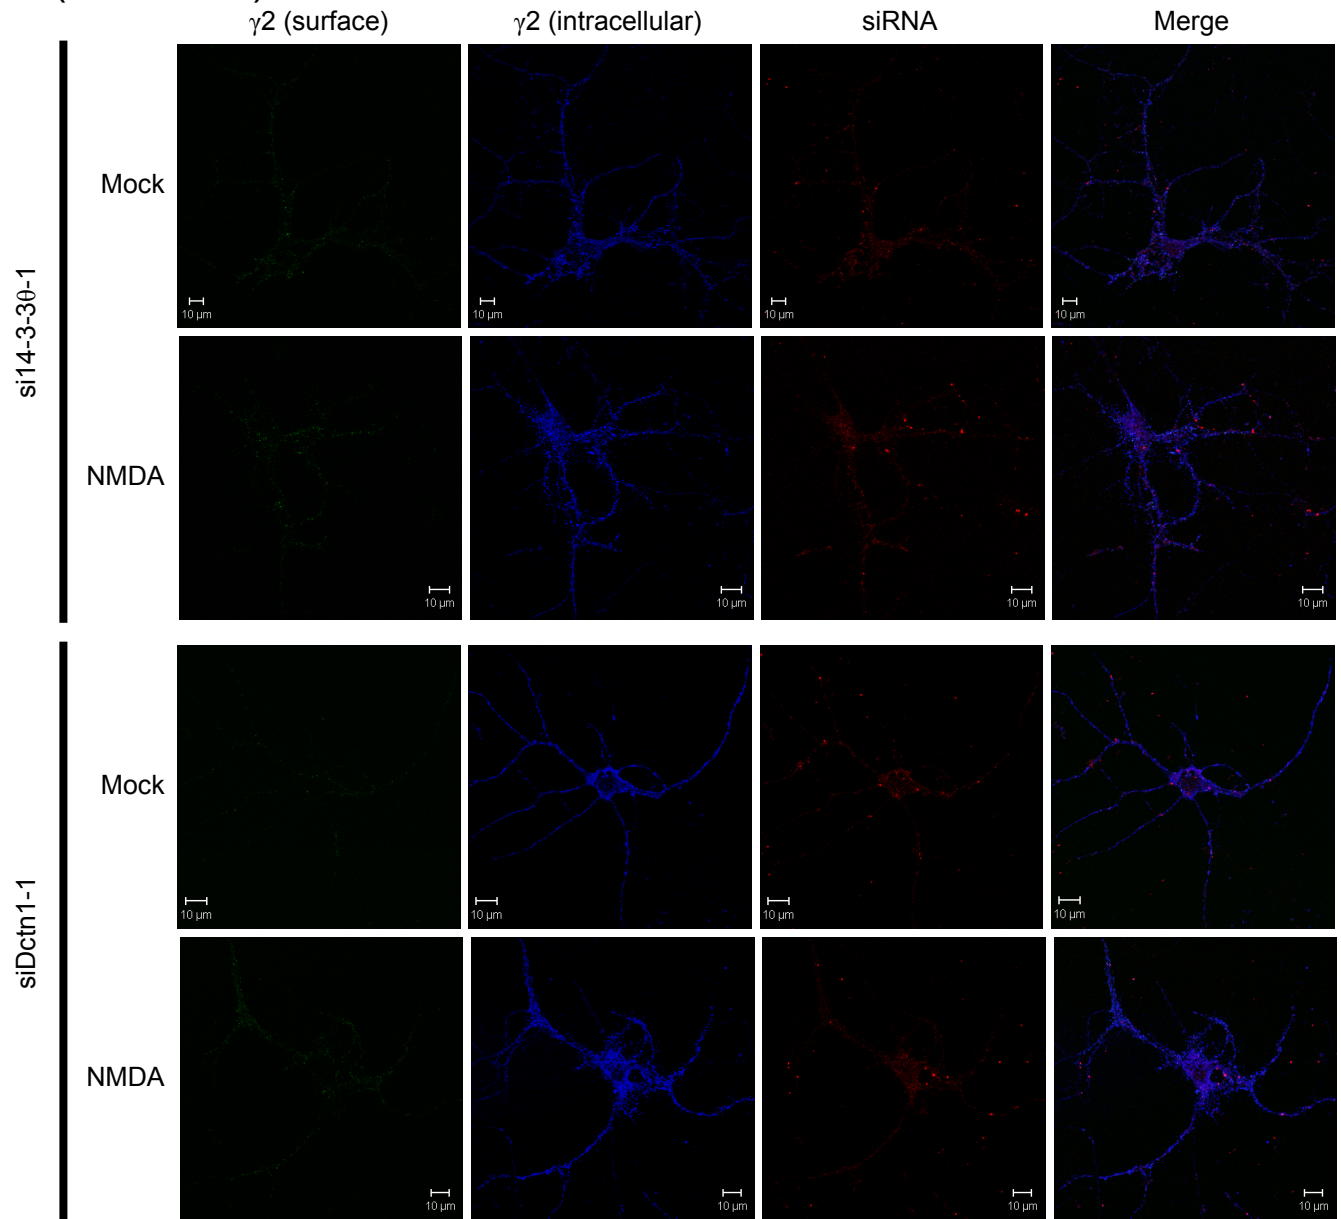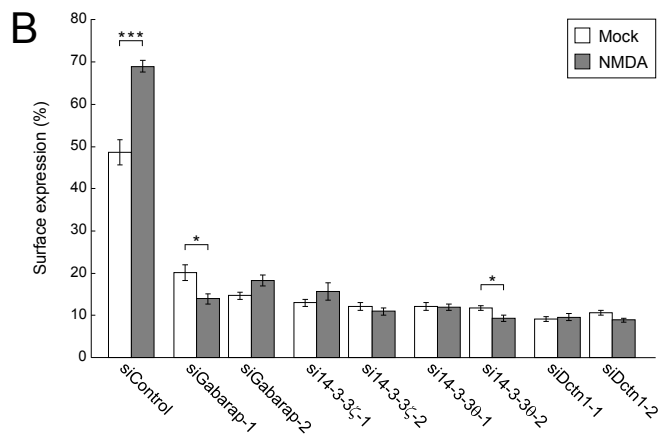

**Supplementary Fig. 4.** GABARAP, 14-3-3 $\zeta$ / $\theta$  and dynactin1 are required for GABA<sub>A</sub>R transport during chem-iLTP

(A) WT hippocampal neurons were transfected with the indicated siRNA plus Red Fluorescent Oligo. After treatment with vehicle (mock) or low-dose NMDA, surface (green) and intracellular (blue) levels of the  $\gamma$ 2 subunit in the perisomatic regions of siRNA-transfected neurons (red) were analyzed. Scale bars, 10  $\mu$ m.

(B) Quantitative analyses of  $\gamma$ 2 fluorescent signals in the perisomatic regions.

Data are shown as the mean  $\pm$  SEM. \* $P$  < 0.05; \*\*\* $P$  < 0.001 (Student's  $t$ -test).  $n$  = 10 (for each siRNA) across two independent experiments.

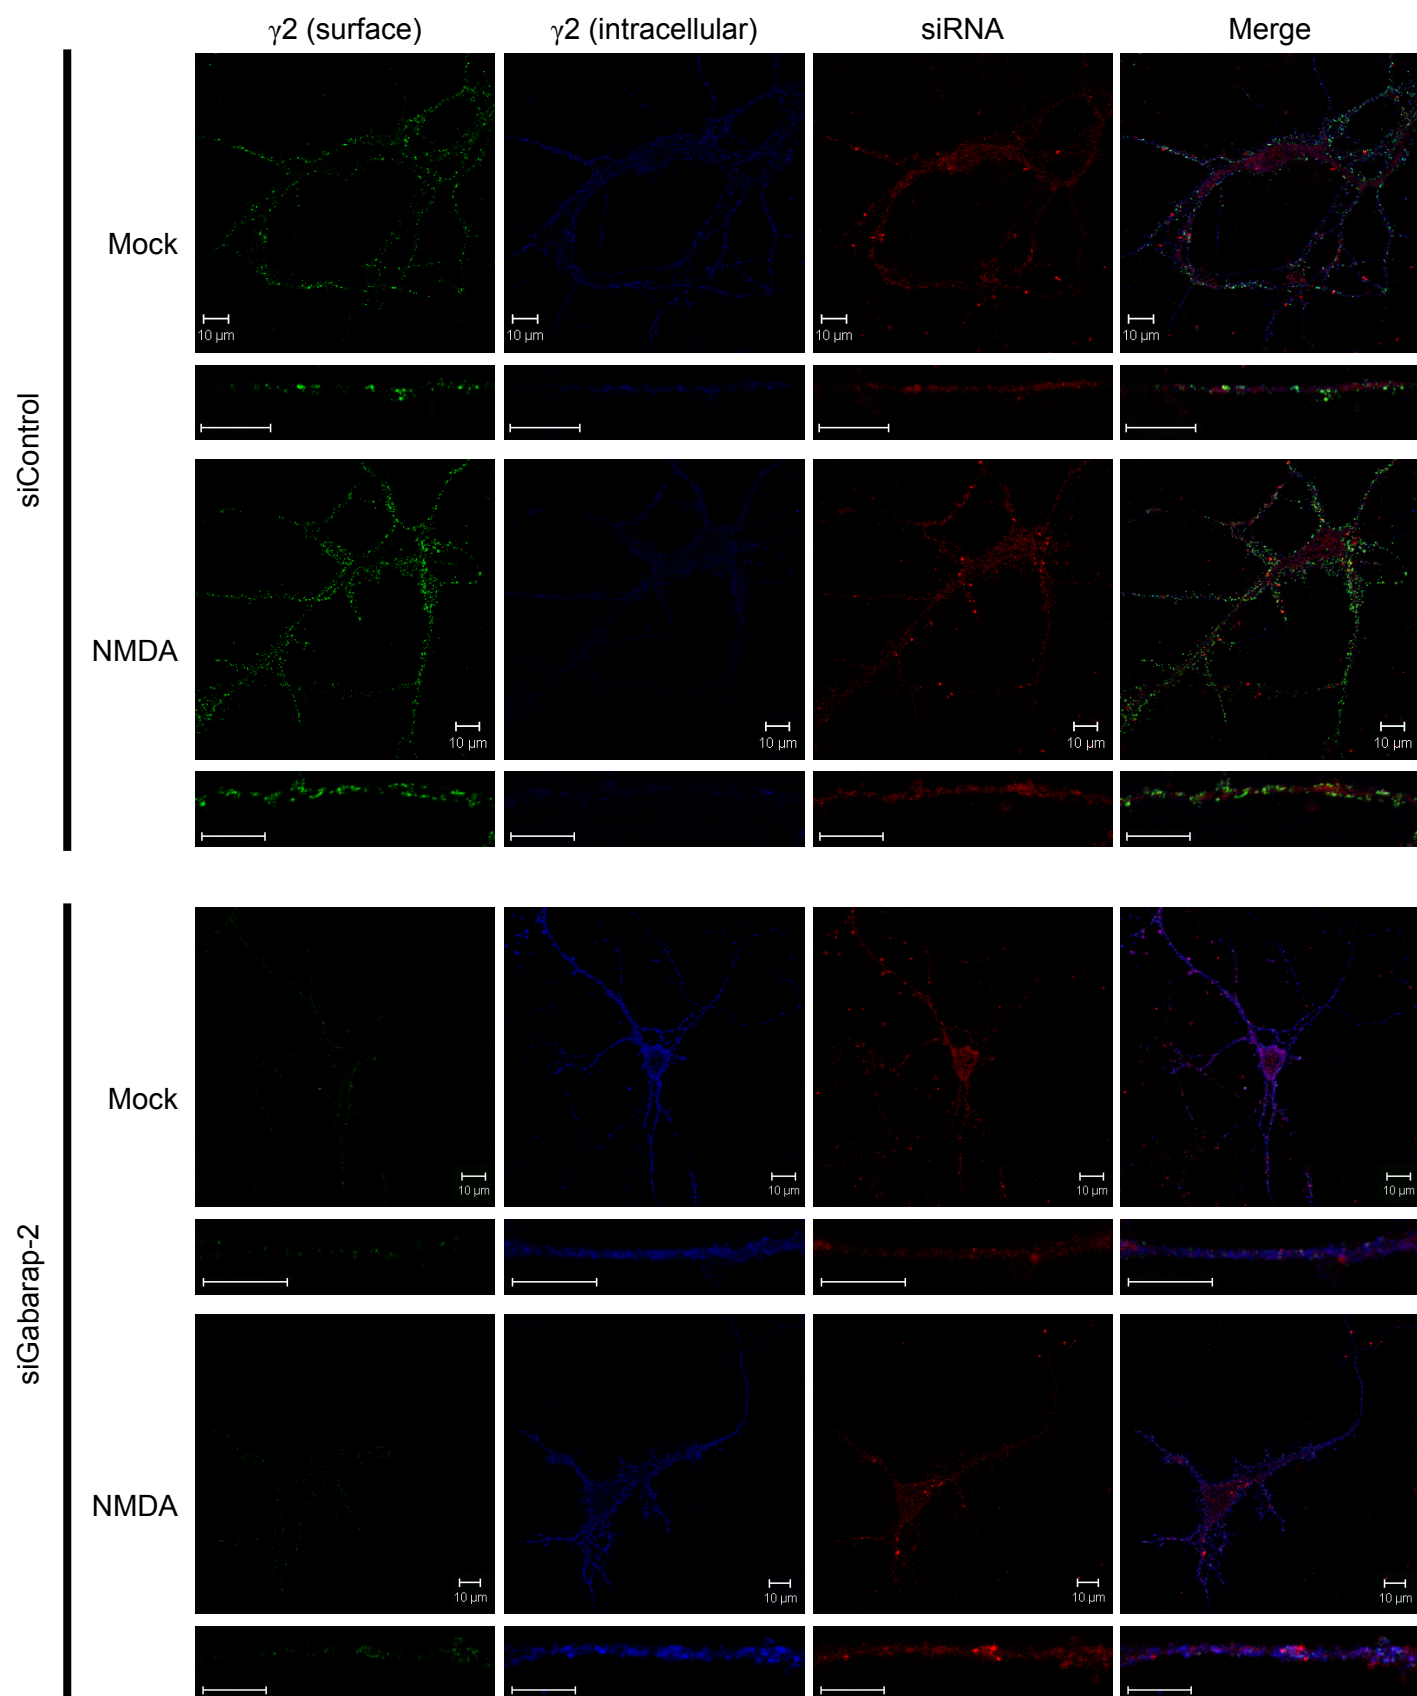



Fig. S5 (continued)

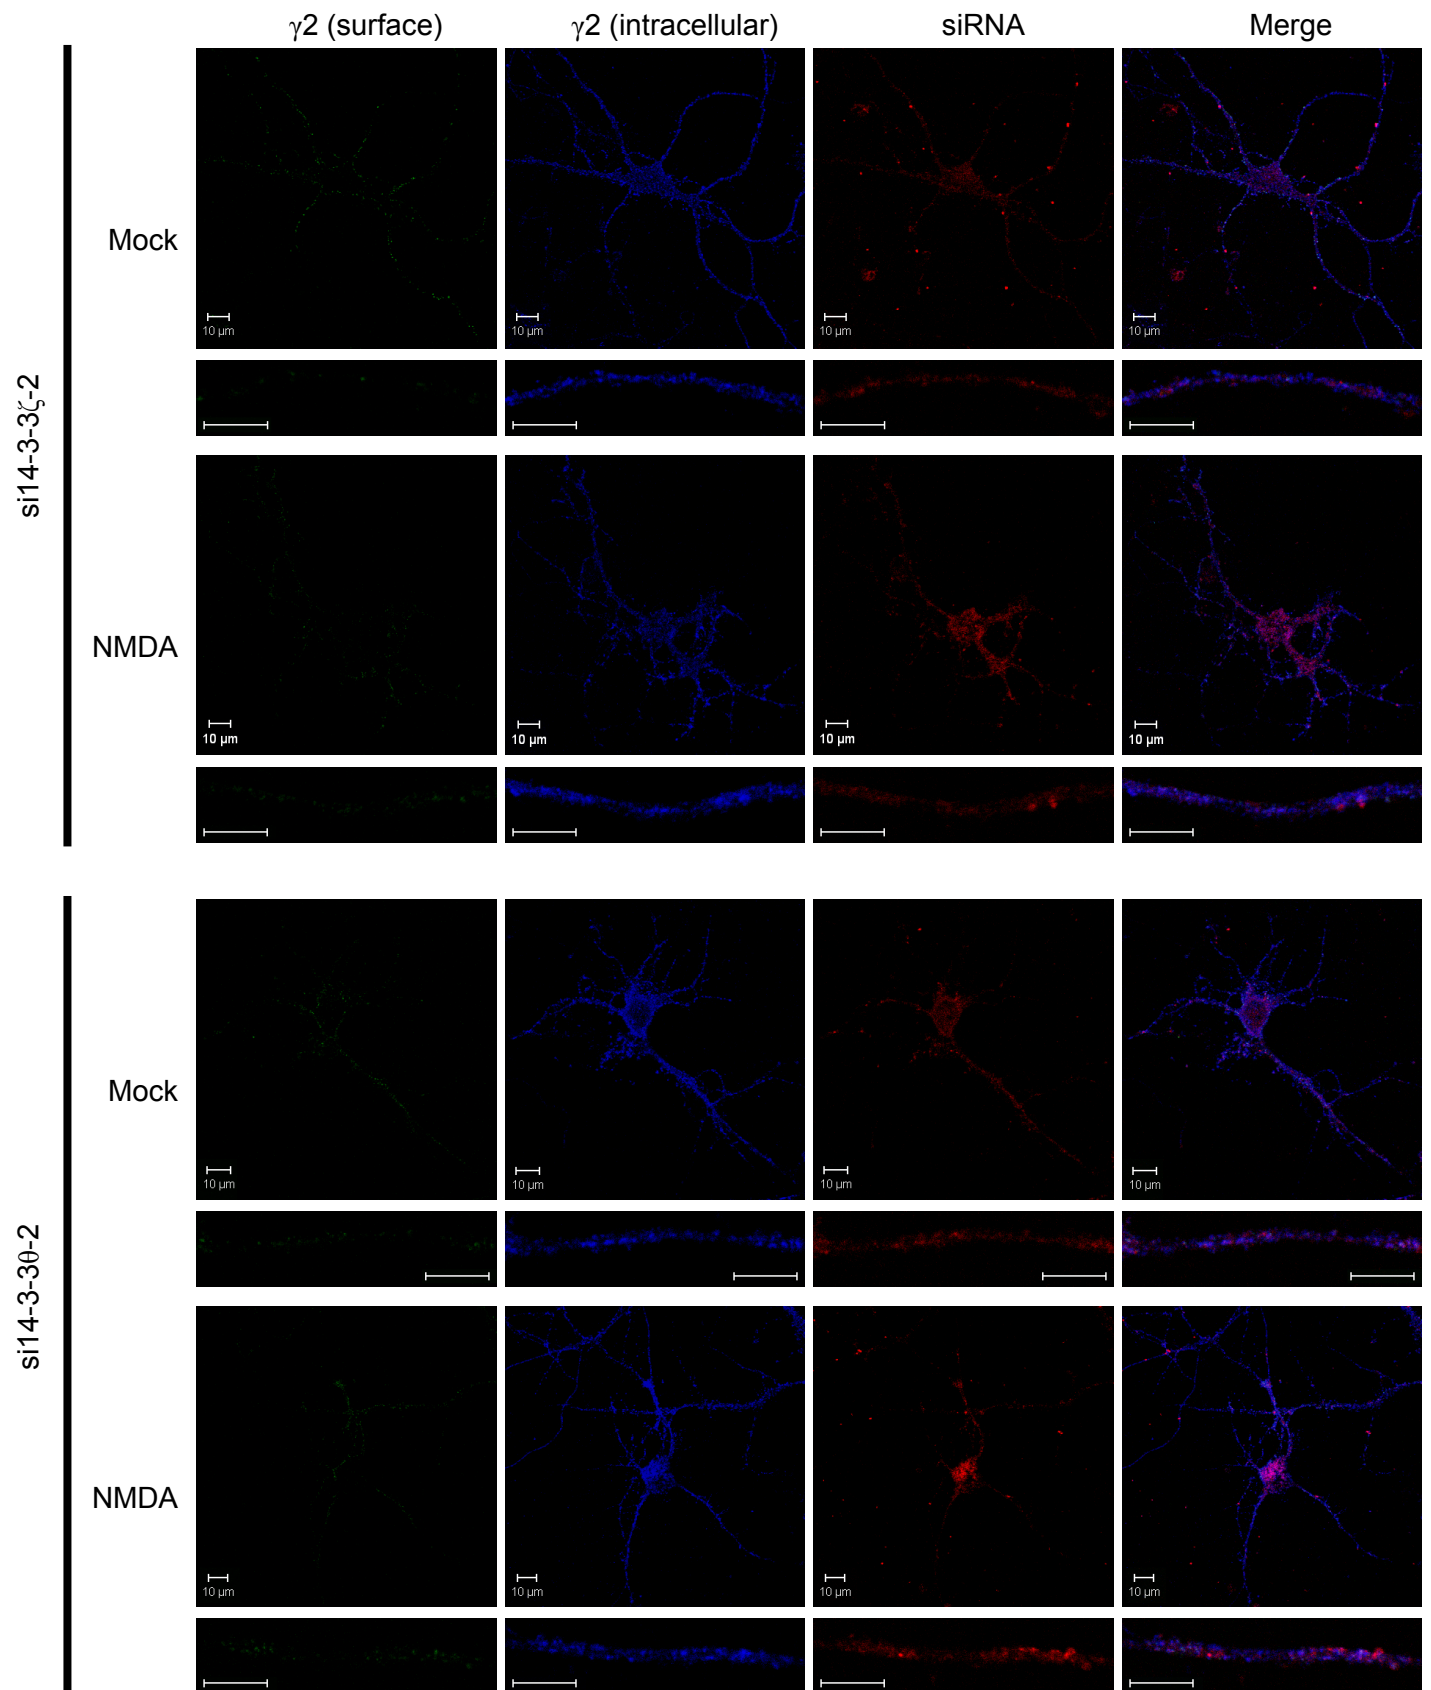

Fig. S5 (continued)

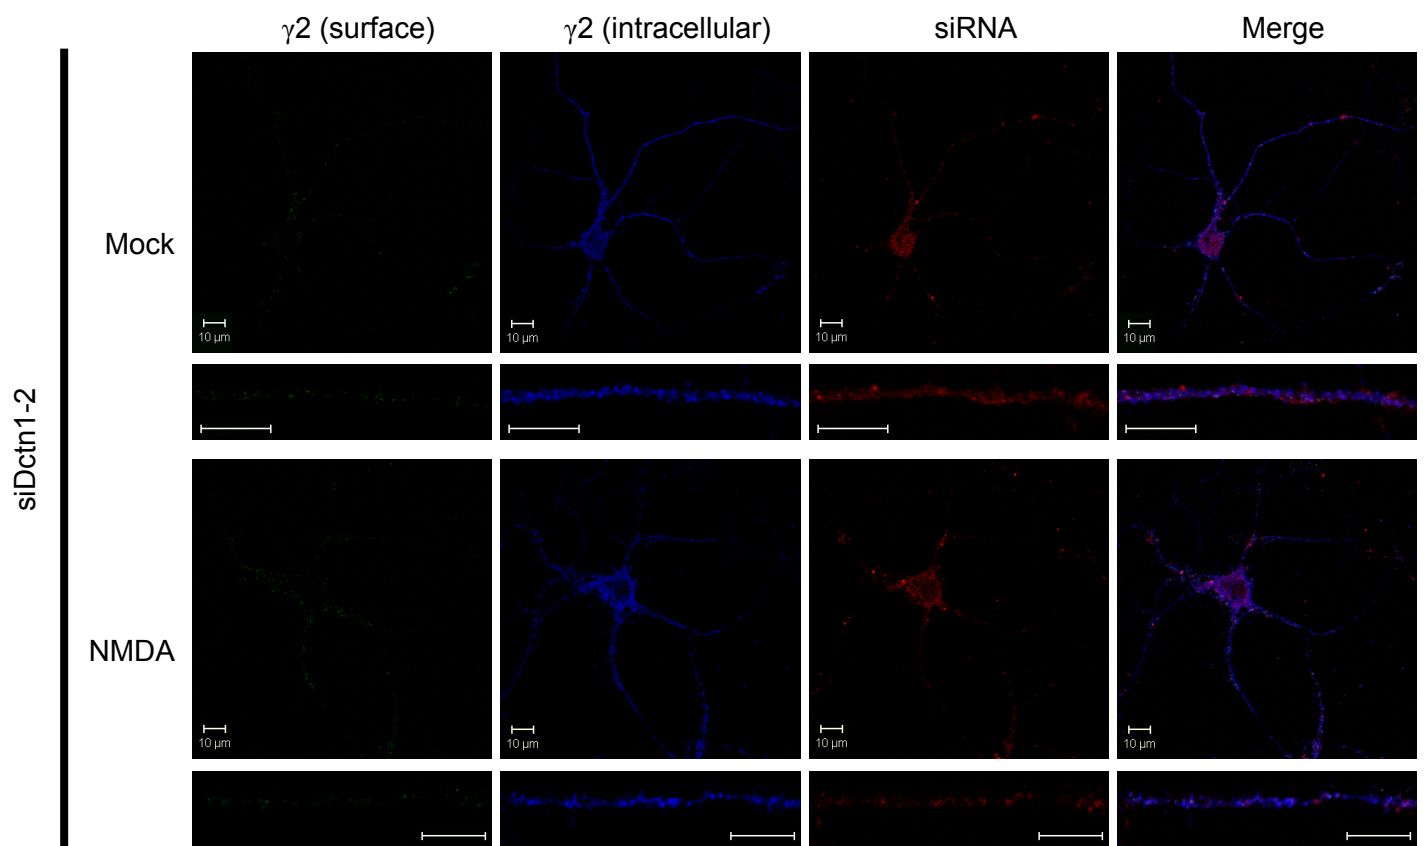

**Supplementary Fig. 5.** GABARAP, 14-3-3 $\zeta/\theta$  and dynactin1 are required for GABA<sub>A</sub>R transport during chem-iLTP

WT hippocampal neurons (10 DIV) were transfected with the indicated siRNAs, the nucleotide sequences of which are different from those used in Figure 2 although they target the same mRNAs. Red Fluorescent Oligo was co-transfected to identify siRNA-transfected neurons. After treatment with vehicle (mock) or low-dose NMDA, surface (green) and intracellular (blue) levels of the  $\gamma 2$  subunit in the perisomatic regions and in the distal dendrites of siRNA-transfected neurons (red) were analyzed. The quantitative data were integrated into Fig. 2B–D (the distal dendrites) and Supplementary Fig. 4B (the perisomatic regions). Scale bars, 10  $\mu\text{m}$ .



A

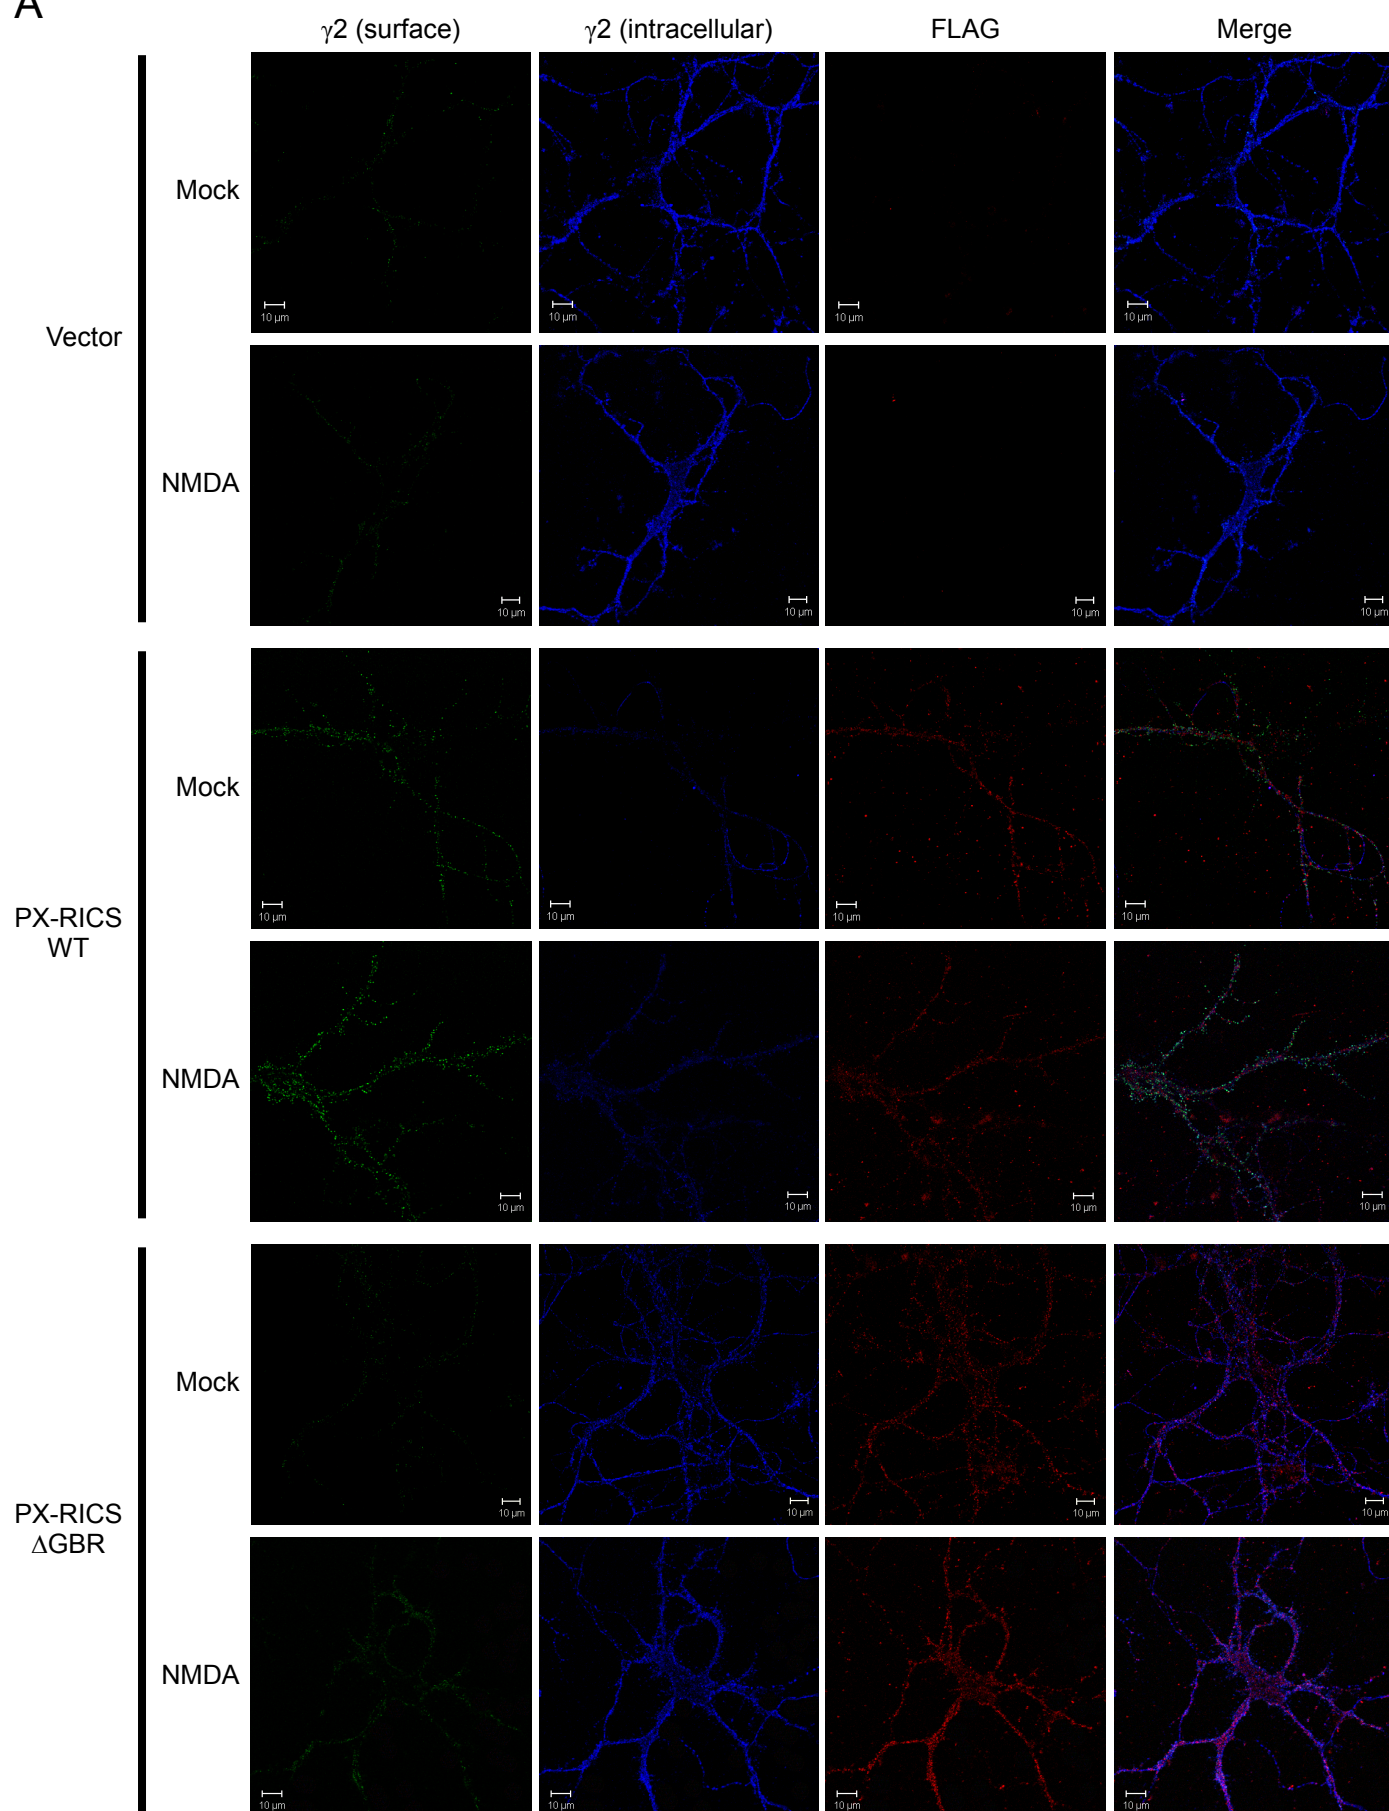

A (continued)

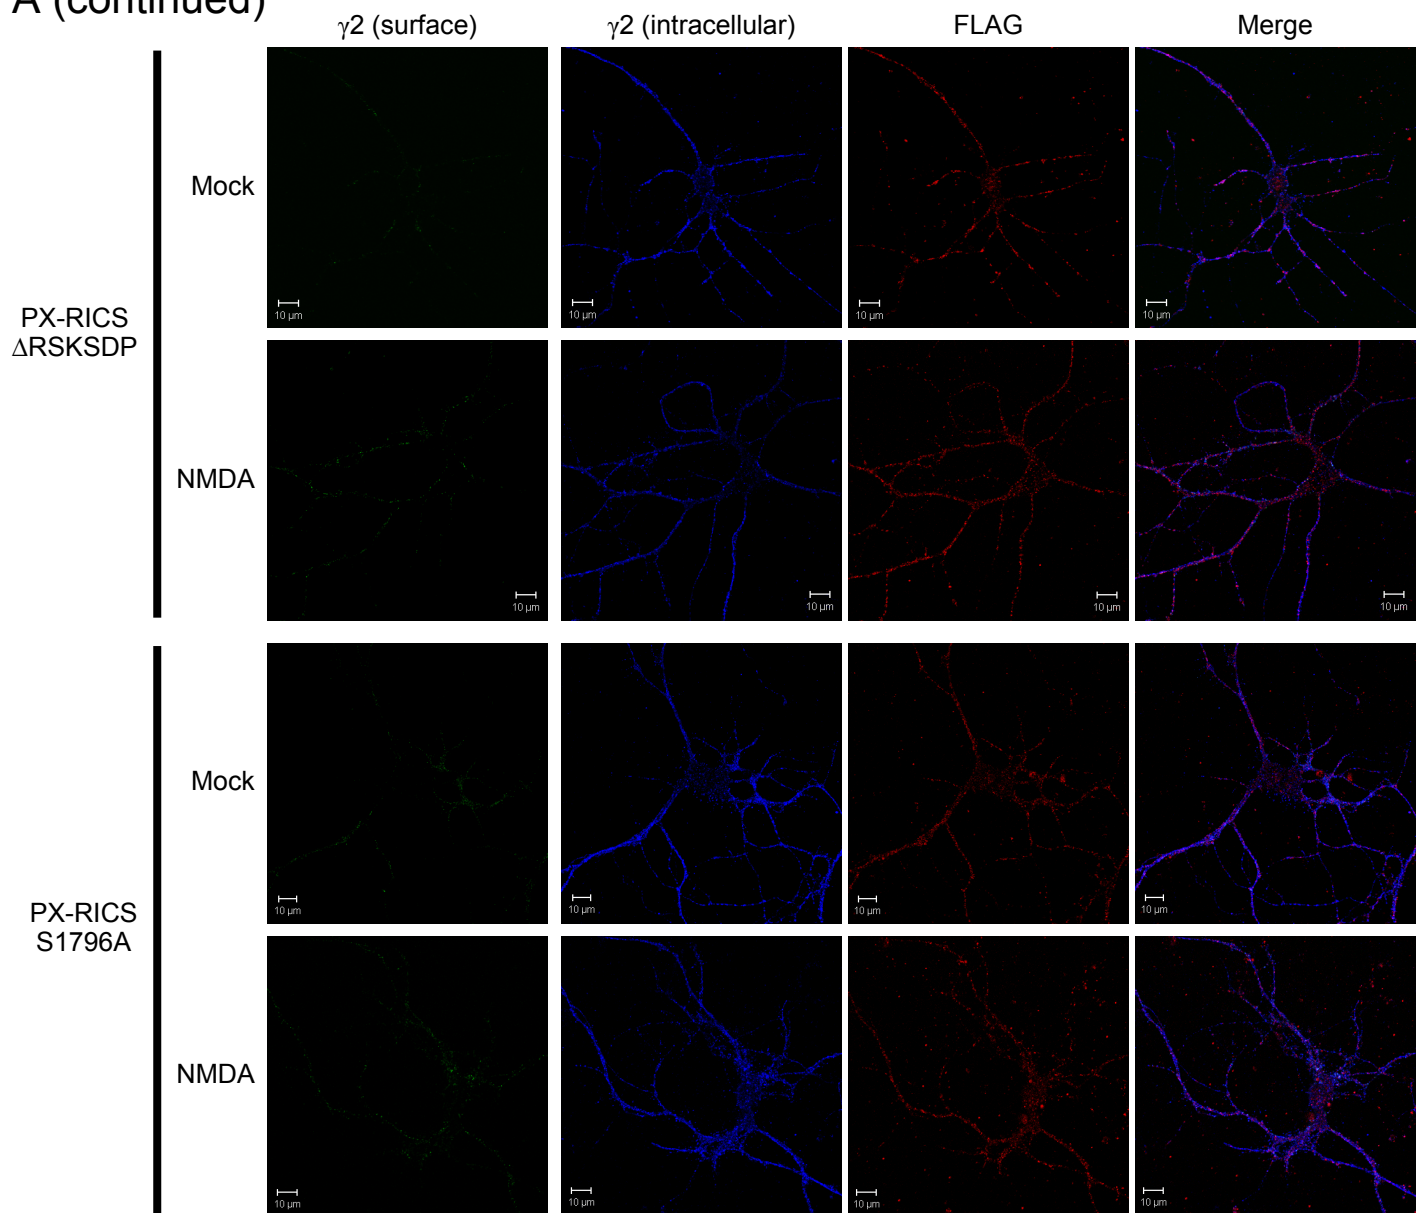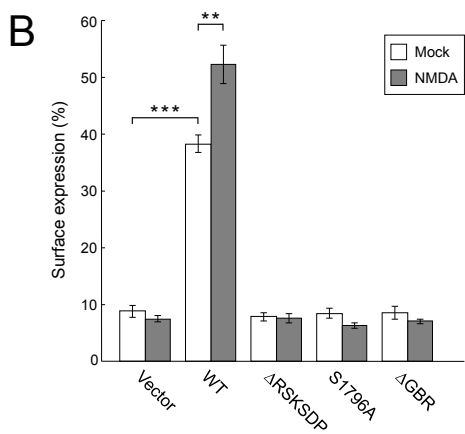

**Supplementary Fig. 6.** GABA<sub>A</sub>R transport during chem-iLTP requires complex formation of PX-RICS with GABARAP and 14-3-3 $\zeta$ / $\theta$

(A) KO hippocampal neurons were transfected with plasmids expressing FLAG-tagged wild-type or mutant PX-RICS as indicated. After mock or moderate NMDA stimulation, surface-expressed (green) and intracellular (blue) levels of the  $\gamma$ 2 subunit in the perisomatic regions of transfected neurons (red) were analyzed. Scale bars, 10  $\mu$ m.

(B) Quantitative analyses of  $\gamma$ 2 fluorescent signals in the perisomatic regions.

Data are shown as the mean  $\pm$  SEM. \*\* $P < 0.01$ ; \*\*\* $P < 0.001$  (Student's  $t$ -test).  $n = 10$  (for each construct) across two independent experiments.

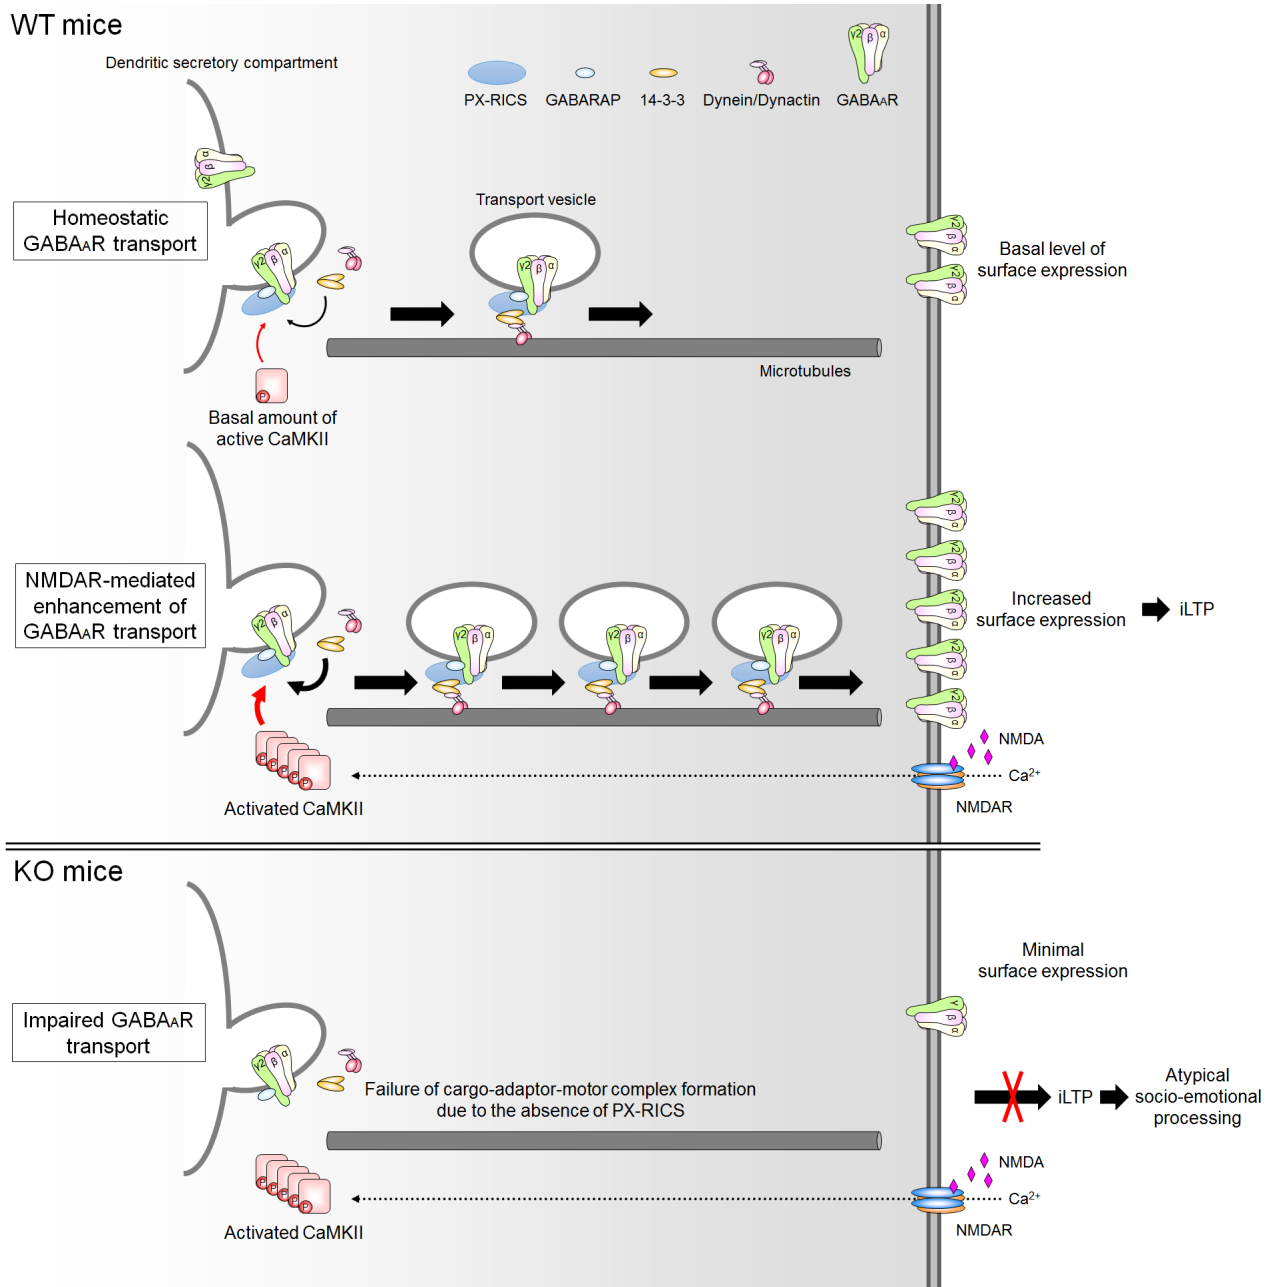

**Supplementary Fig. 7.** PX-RICS–mediated GABA<sub>A</sub>R trafficking underlies NMDAR–dependent GABAergic iLTP

PX-RICS, GABARAP and 14-3-3s are assembled to form an adaptor complex that interconnects  $\gamma$ 2-containing GABA<sub>A</sub>Rs (cargo) and dynein/dynactin (motor). Interaction of PX-RICS with 14-3-3s depends on the phosphorylation activity of CaMKII, and this interaction is a critical regulatory point for GABA<sub>A</sub>R trafficking. When CaMKII activity is at a basal level, the PX-RICS–mediated trafficking complex has a role in steady-state transport of GABA<sub>A</sub>Rs to maintain the number of surface GABA<sub>A</sub>Rs as needed for proper synaptic inhibition.<sup>3</sup> Neural activity that evokes moderate Ca<sup>2+</sup> influx through NMDAR preferentially increases the activated form of CaMKII and elicits its translocation to inhibitory synapses,<sup>26</sup> where it phosphorylates target proteins such as gephyrin and the GABA<sub>A</sub>R  $\beta$ 3 subunit.<sup>37,38,49</sup> Phosphorylated gephyrin and the GABA<sub>A</sub>R  $\beta$ 3 subunit regulate the surface dynamics of GABA<sub>A</sub>Rs such as lateral diffusion and synaptic confinement.<sup>37,38,49,58</sup> The present study has revealed that PX-RICS is a downstream CaMKII target associated with anterograde transport of GABA<sub>A</sub>Rs. Enhanced PX-RICS phosphorylation increases the PX-RICS–14-3-3 complex and thereby drives *de novo* GABA<sub>A</sub>R surface expression, resulting in GABAergic iLTP. Dysfunction of this trafficking mechanism in the amygdala causes impaired GABAergic synaptic plasticity, which may contribute to deficits in socio-emotional behavior as observed in *PX-RICS/RICS*–deficient mice and JBS patients with autism.

| Supplementary Table 1. Summary of the statistical analysis for the behavioral data |                                                            |                    |                 |               |                 |         |               |                  |               |               |               |            |         |              |                   |                   |       |       |    |
|------------------------------------------------------------------------------------|------------------------------------------------------------|--------------------|-----------------|---------------|-----------------|---------|---------------|------------------|---------------|---------------|---------------|------------|---------|--------------|-------------------|-------------------|-------|-------|----|
| Test                                                                               | Number of mice                                             | Session            | Measurement     | Genotype      | Treatment       | Mean    | SEM           | Statistical test | F value       | P value       | post hoc test | Comparison | F value | P value      | Figure            |                   |       |       |    |
| Fear conditioning                                                                  | WT = 26<br>KO = 26                                         | Conditioning       | Activity        | WT            |                 | 690.96  | 31.73         | One-way ANOVA    | 1.94          | NS            |               |            |         |              | 5B                |                   |       |       |    |
|                                                                                    |                                                            |                    |                 | KO            |                 | 774.94  | 49.08         |                  |               |               |               |            |         |              |                   |                   |       |       |    |
|                                                                                    |                                                            |                    | Freezing rate   | WT            |                 | 1.75    | 0.39          | One-way ANOVA    | 0.56          | NS            |               |            |         |              |                   | 5C                |       |       |    |
|                                                                                    |                                                            |                    |                 | KO            |                 | 1.30    | 0.46          |                  |               |               |               |            |         |              |                   |                   |       |       |    |
|                                                                                    |                                                            |                    | Contextual test | Freezing rate | WT              |         | 40.28         | 3.91             | One-way ANOVA | 1.56          | NS            |            |         |              |                   |                   | 5D    |       |    |
|                                                                                    |                                                            |                    |                 |               | KO              |         | 33.32         | 3.97             |               |               |               |            |         |              |                   |                   |       |       |    |
|                                                                                    |                                                            | Freezing rate      |                 | 0-30 s        | WT              |         | 30.06         | 3.42             | One-way ANOVA | 4.72          | <0.05         |            |         |              |                   |                   | 5E    |       |    |
|                                                                                    |                                                            |                    |                 |               | KO              |         | 19.86         | 3.21             |               |               |               |            |         |              |                   |                   |       |       |    |
|                                                                                    |                                                            |                    |                 | 30-60 s       | WT              |         | 36.60         | 3.79             | One-way ANOVA | 0.35          | NS            |            |         |              |                   |                   |       |       |    |
|                                                                                    |                                                            |                    |                 |               | KO              |         | 33.20         | 4.28             |               |               |               |            |         |              |                   |                   |       |       |    |
|                                                                                    |                                                            |                    |                 | 60-90 s       | WT              |         | 45.57         | 4.77             | One-way ANOVA | 0.59          | NS            |            |         |              |                   |                   |       |       |    |
|                                                                                    |                                                            |                    |                 |               | KO              |         | 40.45         | 4.70             |               |               |               |            |         |              |                   |                   |       |       |    |
|                                                                                    |                                                            |                    |                 | 90-120 s      | WT              |         | 44.50         | 4.69             | One-way ANOVA | 1.55          | NS            |            |         |              |                   |                   |       |       |    |
|                                                                                    |                                                            |                    |                 |               | KO              |         | 36.93         | 3.87             |               |               |               |            |         |              |                   |                   |       |       |    |
|                                                                                    |                                                            |                    |                 | 120-150 s     | WT              |         | 47.18         | 4.62             | One-way ANOVA | 1.80          | NS            |            |         |              |                   |                   |       |       |    |
|                                                                                    |                                                            |                    |                 |               | KO              |         | 38.13         | 4.91             |               |               |               |            |         |              |                   |                   |       |       |    |
|                                                                                    |                                                            |                    |                 | 150-180 s     | WT              |         | 46.48         | 5.38             | One-way ANOVA | 2.48          | NS            |            |         |              |                   |                   |       |       |    |
|                                                                                    |                                                            |                    |                 |               | KO              |         | 34.94         | 4.97             |               |               |               |            |         |              |                   |                   |       |       |    |
|                                                                                    |                                                            | 180-210 s          |                 | WT            |                 | 36.28   | 4.73          | One-way ANOVA    | 0.03          | NS            |               |            |         |              |                   |                   |       |       |    |
|                                                                                    |                                                            |                    |                 | KO            |                 | 34.93   | 5.74          |                  |               |               |               |            |         |              |                   |                   |       |       |    |
|                                                                                    |                                                            | 210-240 s          |                 | WT            |                 | 40.58   | 5.49          | One-way ANOVA    | 0.59          | NS            |               |            |         |              |                   |                   |       |       |    |
|                                                                                    |                                                            |                    |                 | KO            |                 | 34.55   | 5.59          |                  |               |               |               |            |         |              |                   |                   |       |       |    |
|                                                                                    |                                                            | 240-270 s          |                 | WT            |                 | 39.55   | 5.37          | One-way ANOVA    | 1.20          | NS            |               |            |         |              |                   |                   |       |       |    |
|                                                                                    |                                                            |                    |                 | KO            |                 | 31.35   | 5.23          |                  |               |               |               |            |         |              |                   |                   |       |       |    |
|                                                                                    |                                                            | 270-300 s          |                 | WT            |                 | 36.02   | 5.00          | One-way ANOVA    | 0.89          | NS            |               |            |         |              |                   |                   |       |       |    |
|                                                                                    |                                                            |                    |                 | KO            |                 | 28.85   | 5.74          |                  |               |               |               |            |         |              |                   |                   |       |       |    |
|                                                                                    |                                                            | Cued test          |                 |               | Freezing rate   | Pre-CS  | WT            |                  | 3.57          | 0.80          | Two-way ANOVA | 20.86      | <0.01   | Bonferroni's | WT, Pre-CS vs. CS | 116.88            | <0.01 | 5F    |    |
|                                                                                    |                                                            |                    |                 |               |                 |         | KO            |                  | 1.71          | 0.56          |               |            |         |              | KO, Pre-CS vs. CS | 18.93             | <0.01 |       |    |
|                                                                                    |                                                            |                    | CS              |               |                 | WT      |               | 44.54            | 4.33          |               |               |            |         |              |                   | Pre-CS, WT vs. KO | 0.24  | NS    |    |
|                                                                                    |                                                            |                    |                 |               |                 | KO      |               | 18.20            | 3.01          |               |               |            |         |              |                   | CS, WT vs. KO     | 48.30 | <0.01 |    |
|                                                                                    |                                                            |                    | Freezing rate   |               |                 | 0-30 s  | WT            |                  | 3.19          | 1.03          | One-way ANOVA | 0.92       | NS      |              |                   |                   |       |       | 5G |
|                                                                                    |                                                            |                    |                 |               |                 |         | KO            |                  | 1.73          | 1.11          |               |            |         |              |                   |                   |       |       |    |
|                                                                                    |                                                            |                    |                 |               | 30-60 s         | WT      |               | 2.57             | 0.98          | One-way ANOVA | 0.66          | NS         |         |              |                   |                   |       |       |    |
|                                                                                    |                                                            |                    |                 |               |                 | KO      |               | 1.54             | 0.75          |               |               |            |         |              |                   |                   |       |       |    |
|                                                                                    |                                                            |                    |                 |               | 60-90 s         | WT      |               | 4.17             | 1.50          | One-way ANOVA | 1.77          | NS         |         |              |                   |                   |       |       |    |
|                                                                                    |                                                            |                    |                 |               |                 | KO      |               | 1.92             | 0.72          |               |               |            |         |              |                   |                   |       |       |    |
|                                                                                    |                                                            |                    |                 |               | 90-120 s        | WT      |               | 2.49             | 0.85          | One-way ANOVA | 0.45          | NS         |         |              |                   |                   |       |       |    |
|                                                                                    |                                                            |                    |                 |               |                 | KO      |               | 1.67             | 0.86          |               |               |            |         |              |                   |                   |       |       |    |
|                                                                                    |                                                            |                    |                 |               | 120-150 s       | WT      |               | 62.44            | 4.80          | One-way ANOVA | 21.68         | <0.01      |         |              |                   |                   |       |       |    |
|                                                                                    |                                                            |                    |                 |               |                 | KO      |               | 31.92            | 4.47          |               |               |            |         |              |                   |                   |       |       |    |
|                                                                                    |                                                            |                    |                 |               | 150-180 s       | WT      |               | 58.27            | 5.10          | One-way ANOVA | 17.30         | <0.01      |         |              |                   |                   |       |       |    |
|                                                                                    |                                                            |                    |                 |               |                 | KO      |               | 28.46            | 5.03          |               |               |            |         |              |                   |                   |       |       |    |
|                                                                                    |                                                            |                    |                 |               | 180-210 s       | WT      |               | 45.65            | 4.63          | One-way ANOVA | 16.90         | <0.01      |         |              |                   |                   |       |       |    |
|                                                                                    |                                                            |                    |                 |               |                 | KO      |               | 19.30            | 4.44          |               |               |            |         |              |                   |                   |       |       |    |
|                                                                                    |                                                            |                    |                 |               | 210-240 s       | WT      |               | 39.03            | 5.55          | One-way ANOVA | 16.21         | <0.01      |         |              |                   |                   |       |       |    |
|                                                                                    |                                                            |                    |                 |               |                 | KO      |               | 13.08            | 3.28          |               |               |            |         |              |                   |                   |       |       |    |
|                                                                                    |                                                            |                    |                 |               | 240-270 s       | WT      |               | 32.63            | 5.19          | One-way ANOVA | 14.30         | <0.01      |         |              |                   |                   |       |       |    |
|                                                                                    |                                                            |                    |                 |               |                 | KO      |               | 9.61             | 3.18          |               |               |            |         |              |                   |                   |       |       |    |
| 270-300 s                                                                          | WT                                                         |                    |                 |               | 29.22           | 5.85    | One-way ANOVA | 12.96            | <0.01         |               |               |            |         |              |                   |                   |       |       |    |
|                                                                                    | KO                                                         |                    |                 |               | 6.86            | 2.10    |               |                  |               |               |               |            |         |              |                   |                   |       |       |    |
| Pain sensitivity                                                                   | WT = 8<br>KO = 8                                           |                    | Shock intensity | WT            |                 | 0.0250  | 0.0019        | One-way ANOVA    | 3.50          | NS            |               |            |         |              | 5H                |                   |       |       |    |
|                                                                                    |                                                            |                    |                 | KO            |                 | 0.0200  | 0.0019        |                  |               |               |               |            |         |              |                   |                   |       |       |    |
|                                                                                    |                                                            |                    |                 | WT            |                 | 0.0488  | 0.0048        | One-way ANOVA    | 0.03          | NS            |               |            |         |              |                   |                   |       |       |    |
|                                                                                    |                                                            |                    |                 | KO            |                 | 0.0475  | 0.0053        |                  |               |               |               |            |         |              |                   |                   |       |       |    |
|                                                                                    |                                                            |                    |                 | WT            |                 | 0.0825  | 0.0070        | One-way ANOVA    | 0.72          | NS            |               |            |         |              |                   |                   |       |       |    |
|                                                                                    |                                                            |                    |                 | KO            |                 | 0.0900  | 0.0053        |                  |               |               |               |            |         |              |                   |                   |       |       |    |
| Fear conditioning (clonazepam-administered mice)                                   | Vehicle<br>WT = 30<br>KO = 30<br>CZP<br>WT = 30<br>KO = 30 | Conditioning       | Activity        | WT            | Vehicle         | 638.49  | 37.07         | Two-way ANOVA    | 0.11          | NS            |               |            |         |              |                   | 6A                |       |       |    |
|                                                                                    |                                                            |                    |                 | KO            | Vehicle         | 691.81  | 24.51         |                  |               |               |               |            |         |              |                   |                   |       |       |    |
|                                                                                    |                                                            |                    | Freezing rate   | WT            | CZP             | 569.68  | 28.10         | Two-way ANOVA    | 0.06          | NS            |               |            |         |              |                   |                   | 6B    |       |    |
|                                                                                    |                                                            |                    |                 | KO            | CZP             | 642.14  | 25.76         |                  |               |               |               |            |         |              |                   |                   |       |       |    |
|                                                                                    |                                                            |                    | Contextual test | Freezing rate | WT              | Vehicle | 30.33         | 2.84             | Two-way ANOVA | 0.62          | NS            |            |         |              |                   |                   |       |       | 6C |
|                                                                                    |                                                            |                    |                 |               | KO              | Vehicle | 20.32         | 2.69             |               |               |               |            |         |              |                   |                   |       |       |    |
|                                                                                    |                                                            | Freezing rate      |                 | WT            | CZP             | 32.27   | 3.14          | Two-way ANOVA    | 0.95          | NS            |               |            |         |              |                   |                   |       | 6D    |    |
|                                                                                    |                                                            |                    |                 | KO            | CZP             | 27.02   | 3.35          |                  |               |               |               |            |         |              |                   |                   |       |       |    |
|                                                                                    |                                                            | 0-30 s, Vehicle    |                 | WT            |                 | 21.72   | 3.74          | Two-way ANOVA    | 0.99          | NS            |               |            |         |              |                   |                   |       |       |    |
|                                                                                    |                                                            |                    |                 | KO            |                 | 8.06    | 2.07          |                  |               |               |               |            |         |              |                   |                   |       |       |    |
|                                                                                    |                                                            | 0-30 s, CZP        |                 | WT            |                 | 25.93   | 3.39          | Two-way ANOVA    | 0.30          | NS            |               |            |         |              |                   |                   |       |       |    |
|                                                                                    |                                                            |                    |                 | KO            |                 | 18.66   | 3.65          |                  |               |               |               |            |         |              |                   |                   |       |       |    |
|                                                                                    |                                                            | 30-60 s, Vehicle   |                 | WT            |                 | 30.17   | 3.18          | Two-way ANOVA    | 0.48          | NS            |               |            |         |              |                   |                   |       |       |    |
|                                                                                    |                                                            |                    |                 | KO            |                 | 18.00   | 2.84          |                  |               |               |               |            |         |              |                   |                   |       |       |    |
|                                                                                    |                                                            | 30-60 s, CZP       |                 | WT            |                 | 35.83   | 3.98          | Two-way ANOVA    | 0.05          | NS            |               |            |         |              |                   |                   |       |       |    |
|                                                                                    |                                                            |                    |                 | KO            |                 | 30.78   | 4.12          |                  |               |               |               |            |         |              |                   |                   |       |       |    |
|                                                                                    |                                                            | 60-90 s, Vehicle   |                 | WT            |                 | 36.62   | 3.09          | Two-way ANOVA    | 0.17          | NS            |               |            |         |              |                   |                   |       |       |    |
|                                                                                    |                                                            |                    |                 | KO            |                 | 26.17   | 3.77          |                  |               |               |               |            |         |              |                   |                   |       |       |    |
|                                                                                    |                                                            | 60-90 s, CZP       |                 | WT            |                 | 38.78   | 3.51          | Two-way ANOVA    | 0.08          | NS            |               |            |         |              |                   |                   |       |       |    |
|                                                                                    |                                                            |                    |                 | KO            |                 | 32.45   | 4.50          |                  |               |               |               |            |         |              |                   |                   |       |       |    |
|                                                                                    |                                                            | 90-120 s, Vehicle  |                 | WT            |                 | 38.43   | 3.79          | Two-way ANOVA    | 1.89          | NS            |               |            |         |              |                   |                   |       |       |    |
|                                                                                    |                                                            |                    |                 | KO            |                 | 29.17   | 3.89          |                  |               |               |               |            |         |              |                   |                   |       |       |    |
|                                                                                    |                                                            | 90-120 s, CZP      |                 | WT            |                 | 40.06   | 3.58          | Two-way ANOVA    | 1.06          | NS            |               |            |         |              |                   |                   |       |       |    |
|                                                                                    |                                                            |                    |                 | KO            |                 | 36.34   | 4.65          |                  |               |               |               |            |         |              |                   |                   |       |       |    |
|                                                                                    |                                                            | 120-150 s, Vehicle |                 | WT            |                 | 31.33   | 3.87          | Two-way ANOVA    | 1.09          | NS            |               |            |         |              |                   |                   |       |       |    |
|                                                                                    |                                                            |                    |                 | KO            |                 | 29.55   | 4.07          |                  |               |               |               |            |         |              |                   |                   |       |       |    |
|                                                                                    |                                                            | 120-150 s, CZP     |                 | WT            |                 | 38.95   | 4.12          | Two-way ANOVA    | 0.17          | NS            |               |            |         |              |                   |                   |       |       |    |
|                                                                                    |                                                            |                    |                 | KO            |                 | 35.33   | 4.66          |                  |               |               |               |            |         |              |                   |                   |       |       |    |
|                                                                                    |                                                            | 150-180 s, Vehicle | WT              |               | 32.45           | 3.90    | Two-way ANOVA | 0.08             | NS            |               |               |            |         |              |                   |                   |       |       |    |
|                                                                                    |                                                            |                    | KO              |               | 23.99           | 3.52    |               |                  |               |               |               |            |         |              |                   |                   |       |       |    |
|                                                                                    |                                                            | 150-180 s, CZP     | WT              |               | 40.61           | 4.05    | Two-way ANOVA | 1.89             | NS            |               |               |            |         |              |                   |                   |       |       |    |
|                                                                                    |                                                            |                    | KO              |               | 28.88           | 4.56    |               |                  |               |               |               |            |         |              |                   |                   |       |       |    |
|                                                                                    |                                                            | 180-210 s, Vehicle | WT              |               | 28.34           | 3.45    | Two-way ANOVA | 1.06             | NS            |               |               |            |         |              |                   |                   |       |       |    |
|                                                                                    |                                                            |                    | KO              |               | 20.01           | 3.89    |               |                  |               |               |               |            |         |              |                   |                   |       |       |    |
|                                                                                    |                                                            | 180-210 s, CZP     | WT              |               | 30.44           | 4.14    | Two-way ANOVA | 1.09             | NS            |               |               |            |         |              |                   |                   |       |       |    |
|                                                                                    |                                                            |                    | KO              |               | 24.28           | 3.84    |               |                  |               |               |               |            |         |              |                   |                   |       |       |    |
|                                                                                    |                                                            | 210-240 s, Vehicle | WT              |               | 31.84           | 4.18    | Two-way ANOVA | 1.67             | NS            |               |               |            |         |              |                   |                   |       |       |    |
|                                                                                    |                                                            |                    | KO              |               | 20.22           | 4.14    |               |                  |               |               |               |            |         |              |                   |                   |       |       |    |
|                                                                                    |                                                            | 210-240 s, CZP     | WT              |               | 23.16           | 3.67    | Two-way ANOVA | 0.17             | NS            |               |               |            |         |              |                   |                   |       |       |    |
|                                                                                    |                                                            |                    | KO              |               | 22.67           | 4.15    |               |                  |               |               |               |            |         |              |                   |                   |       |       |    |
|                                                                                    |                                                            | 240-270 s, Vehicle | WT              |               | 26.55           | 4.06    | Two-way ANOVA | 1.06             | NS            |               |               |            |         |              |                   |                   |       |       |    |
|                                                                                    |                                                            |                    | KO              |               | 15.55           | 3.37    |               |                  |               |               |               |            |         |              |                   |                   |       |       |    |
|                                                                                    |                                                            | 240-270 s, CZP     | WT              |               | 25.78           | 4.22    | Two-way ANOVA | 1.67             | NS            |               |               |            |         |              |                   |                   |       |       |    |
|                                                                                    |                                                            |                    | KO              |               | 23.05           | 4.31    |               |                  |               |               |               |            |         |              |                   |                   |       |       |    |
|                                                                                    |                                                            | 270-300 s, Vehicle | WT              |               | 25.83           | 3.79    | Two-way ANOVA | 1.67             | NS            |               |               |            |         |              |                   |                   |       |       |    |
|                                                                                    |                                                            |                    | KO              |               | 12.50           | 3.07    |               |                  |               |               |               |            |         |              |                   |                   |       |       |    |
|                                                                                    |                                                            | 270-300 s, CZP     | WT              |               | 23.11           | 4.62    | Two-way ANOVA | 1.67             | NS            |               |               |            |         |              |                   |                   |       |       |    |
|                                                                                    |                                                            |                    | KO              |               | 17.72           | 3.55    |               |                  |               |               |               |            |         |              |                   |                   |       |       |    |
|                                                                                    |                                                            | Cued test          |                 | Freezing rate | Pre-CS, Vehicle | WT      |               | 4.95             | 0.98          | Two-way ANOVA | 1.67          | NS         |         |              |                   |                   |       |       |    |
|                                                                                    |                                                            |                    |                 |               |                 | KO      |               | 4.07             | 1.25          |               |               |            |         |              |                   |                   |       |       |    |
|                                                                                    |                                                            |                    |                 |               | Pre-CS, CZP     | WT      |               | 0.81             | 0.32          |               |               |            |         |              |                   |                   |       |       |    |
|                                                                                    |                                                            |                    |                 |               |                 | KO      |               | 2.61             | 1.04          |               |               |            |         |              |                   |                   |       |       |    |
| CS, Vehicle                                                                        | WT                                                         |                    | 45.03           | 4.05          |                 |         |               |                  |               |               |               |            |         |              |                   |                   |       |       |    |
|                                                                                    | KO                                                         |                    | 45.03           | 4.05          |                 |         |               |                  |               |               |               |            |         |              |                   |                   |       |       |    |

|               |    |                    |       |      |               |       |       |              |                     |       |       |
|---------------|----|--------------------|-------|------|---------------|-------|-------|--------------|---------------------|-------|-------|
| Freezing rate | WT | CS, CZP            | 37.36 | 4.03 | Two-way ANOVA | 10.29 | <0.01 | Bonferroni's | CZP, WT vs. KO      | 3.69  | NS    |
|               | KO | CS, Vehicle        | 13.40 | 2.37 |               |       |       |              | WT, Vehicle vs. CZP | 2.45  | NS    |
|               |    | CS, CZP            | 27.96 | 3.28 |               |       |       |              | KO, Vehicle vs. CZP | 8.83  | <0.01 |
|               | WT | 0-30 s, Vehicle    | 4.31  | 0.99 | Two-way ANOVA | 3.79  | NS    |              |                     |       |       |
|               | KO | 0-30 s, CZP        | 1.61  | 0.84 |               |       |       |              |                     |       |       |
|               |    |                    | 1.33  | 1.03 |               |       |       |              |                     |       |       |
|               | WT | 30-60 s, Vehicle   | 6.15  | 1.85 | Two-way ANOVA | 3.26  | NS    |              |                     |       |       |
|               | KO | 30-60 s, CZP       | 0.25  | 0.18 |               |       |       |              |                     |       |       |
|               |    |                    | 3.44  | 0.95 |               |       |       |              |                     |       |       |
|               | WT | 60-90 s, Vehicle   | 6.84  | 1.74 | Two-way ANOVA | 1.92  | NS    |              |                     |       |       |
|               | KO | 60-90 s, CZP       | 0.65  | 0.47 |               |       |       |              |                     |       |       |
|               |    |                    | 5.05  | 1.87 |               |       |       |              |                     |       |       |
|               | WT | 90-120 s, Vehicle  | 2.52  | 0.88 | Two-way ANOVA | 0.12  | NS    |              |                     |       |       |
|               | KO | 90-120 s, CZP      | 0.65  | 0.29 |               |       |       |              |                     |       |       |
|               |    |                    | 5.11  | 1.56 |               |       |       |              |                     |       |       |
|               | WT | 120-150 s, Vehicle | 65.39 | 3.92 | Two-way ANOVA | 9.44  | <0.01 | Bonferroni's | Vehicle, WT vs.KO   | 28.56 | <0.01 |
|               | KO | 120-150 s, CZP     | 33.23 | 4.42 |               |       |       |              | CZP, WT vs. KO      | 1.00  | NS    |
|               |    |                    | 58.29 | 3.92 |               |       |       |              | WT, Vehicle vs. CZP | 1.39  | NS    |
|               | WT | 150-180 s, Vehicle | 52.28 | 4.64 | Two-way ANOVA | 10.89 | <0.01 | Bonferroni's | KO, Vehicle vs. CZP | 10.02 | <0.01 |
|               | KO | 150-180 s, CZP     | 59.28 | 4.16 |               |       |       |              | Vehicle, WT vs.KO   | 35.89 | <0.01 |
|               |    |                    | 21.11 | 3.67 |               |       |       |              | CZP, WT vs. KO      | 1.75  | NS    |
|               | WT | 180-210 s, Vehicle | 49.27 | 4.72 | Two-way ANOVA | 9.10  | <0.01 | Bonferroni's | WT, Vehicle vs. CZP | 2.47  | NS    |
|               | KO | 180-210 s, CZP     | 40.84 | 5.42 |               |       |       |              | KO, Vehicle vs. CZP | 9.59  | <0.01 |
|               |    |                    | 46.44 | 5.15 |               |       |       |              | Vehicle, WT vs.KO   | 34.18 | <0.01 |
|               | WT | 210-240 s, Vehicle | 9.44  | 2.29 | Two-way ANOVA | 5.36  | <0.05 | Bonferroni's | CZP, WT vs. KO      | 2.50  | NS    |
|               | KO | 210-240 s, CZP     | 36.33 | 5.38 |               |       |       |              | WT, Vehicle vs. CZP | 2.55  | NS    |
|               |    |                    | 26.33 | 4.72 |               |       |       |              | KO, Vehicle vs. CZP | 7.12  | <0.01 |
|               | WT | 240-270 s, Vehicle | 36.56 | 5.13 | Two-way ANOVA | 4.71  | <0.05 | Bonferroni's | Vehicle, WT vs.KO   | 24.49 | <0.01 |
|               | KO | 240-270 s, CZP     | 6.52  | 2.02 |               |       |       |              | CZP, WT vs. KO      | 2.81  | NS    |
|               |    |                    | 26.22 | 4.83 |               |       |       |              | WT, Vehicle vs. CZP | 2.90  | NS    |
|               | WT | 270-300 s, Vehicle | 16.05 | 4.77 | Two-way ANOVA | 3.41  | NS    | Bonferroni's | KO, Vehicle vs. CZP | 2.47  | NS    |
|               | KO | 270-300 s, CZP     | 34.05 | 5.30 |               |       |       |              | Vehicle, WT vs.KO   | 30.86 | <0.01 |
|               |    |                    | 4.75  | 2.19 |               |       |       |              | CZP, WT vs. KO      | 6.17  | <0.05 |
|               | WT | 300-330 s, Vehicle | 19.44 | 4.52 | Two-way ANOVA | 3.41  | NS    | Bonferroni's | WT, Vehicle vs. CZP | 7.67  | <0.01 |
|               | KO | 300-330 s, CZP     | 6.33  | 2.03 |               |       |       |              | KO, Vehicle vs. CZP | 0.09  | NS    |
|               |    |                    | 28.44 | 4.88 |               |       |       |              | Vehicle, WT vs.KO   | 19.20 | <0.01 |
|               | WT | 330-360 s, Vehicle | 5.35  | 2.62 | Two-way ANOVA | 3.41  | NS    | Bonferroni's | CZP, WT vs. KO      | 3.13  | NS    |
|               | KO | 330-360 s, CZP     | 15.22 | 4.45 |               |       |       |              | WT, Vehicle vs. CZP | 6.30  | <0.05 |
|               |    |                    | 5.89  | 2.52 |               |       |       |              | KO, Vehicle vs. CZP | 0.01  | NS    |
